# Supplementary material for: Optimizing sgRNA structure to improve CRISPR-Cas9 knockout efficiency
Source: PubMed Central journal article supplement (PMC4699467; doi:10.1186/s13059-015-0846-3), 2015-12-15

Figure S1

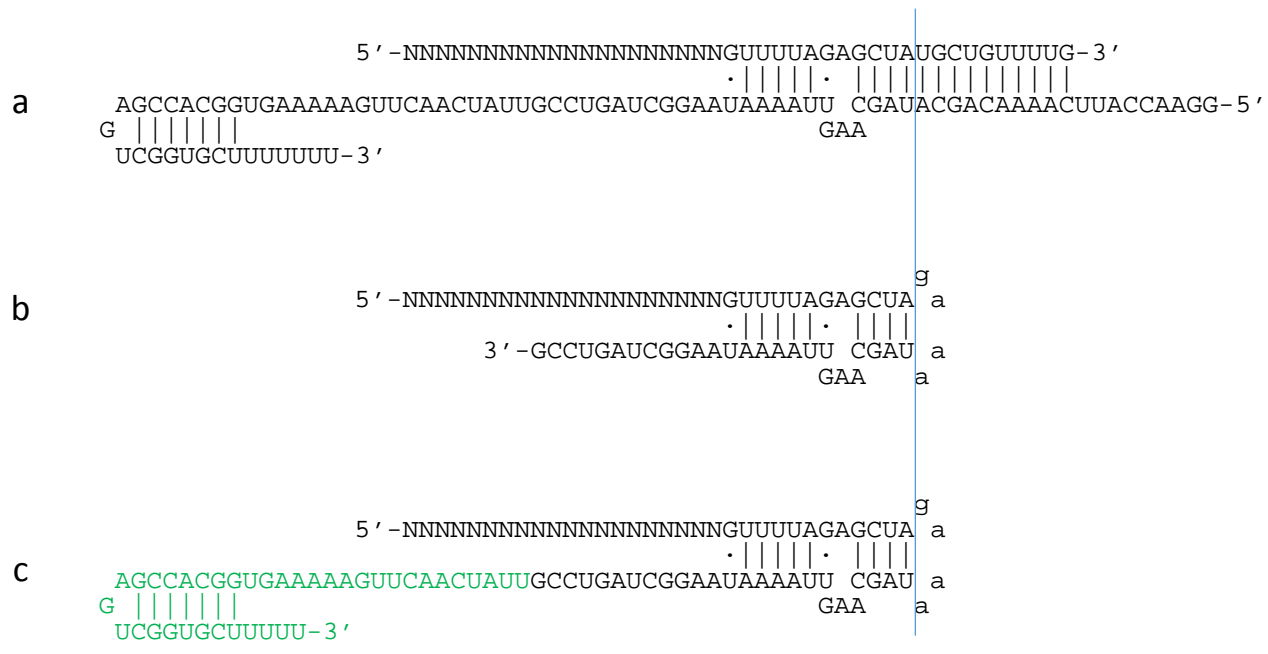

Figure S2

**Sp1**

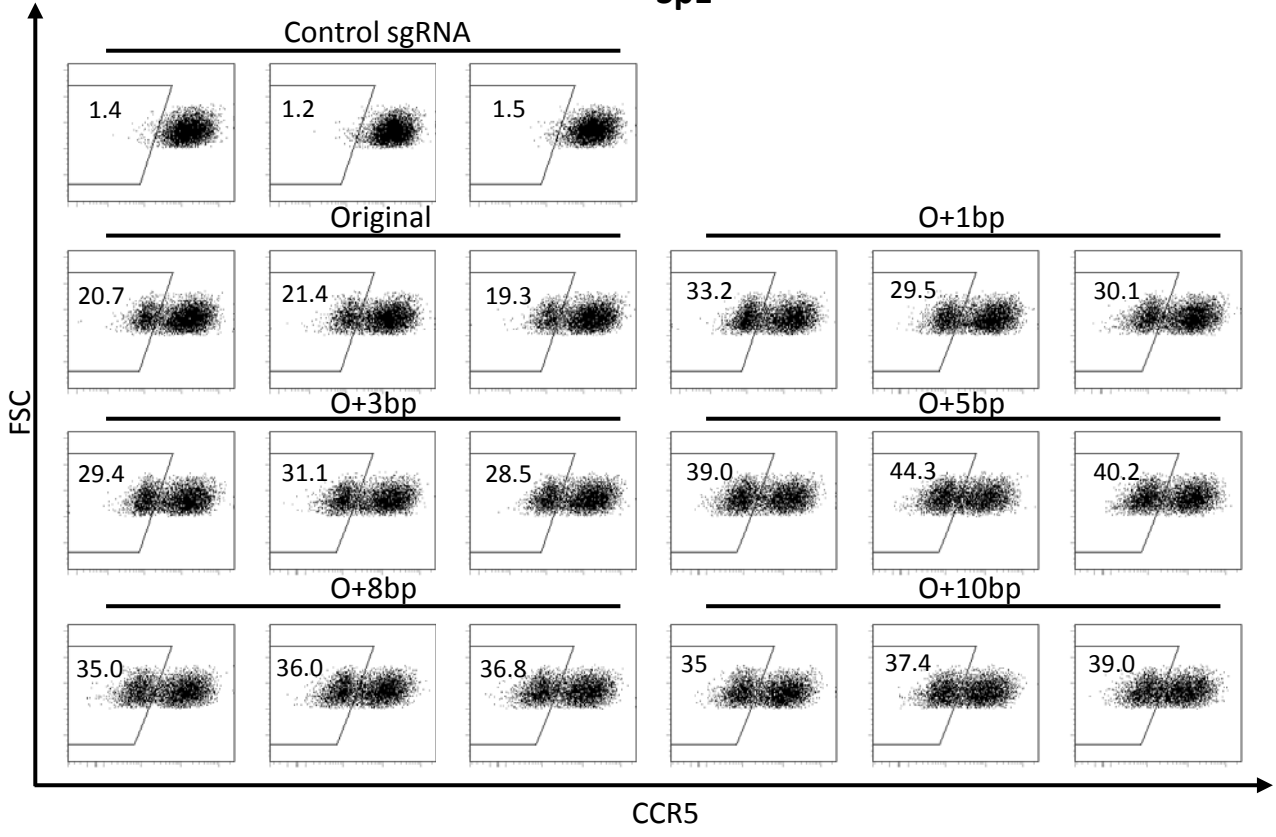

**Sp2**

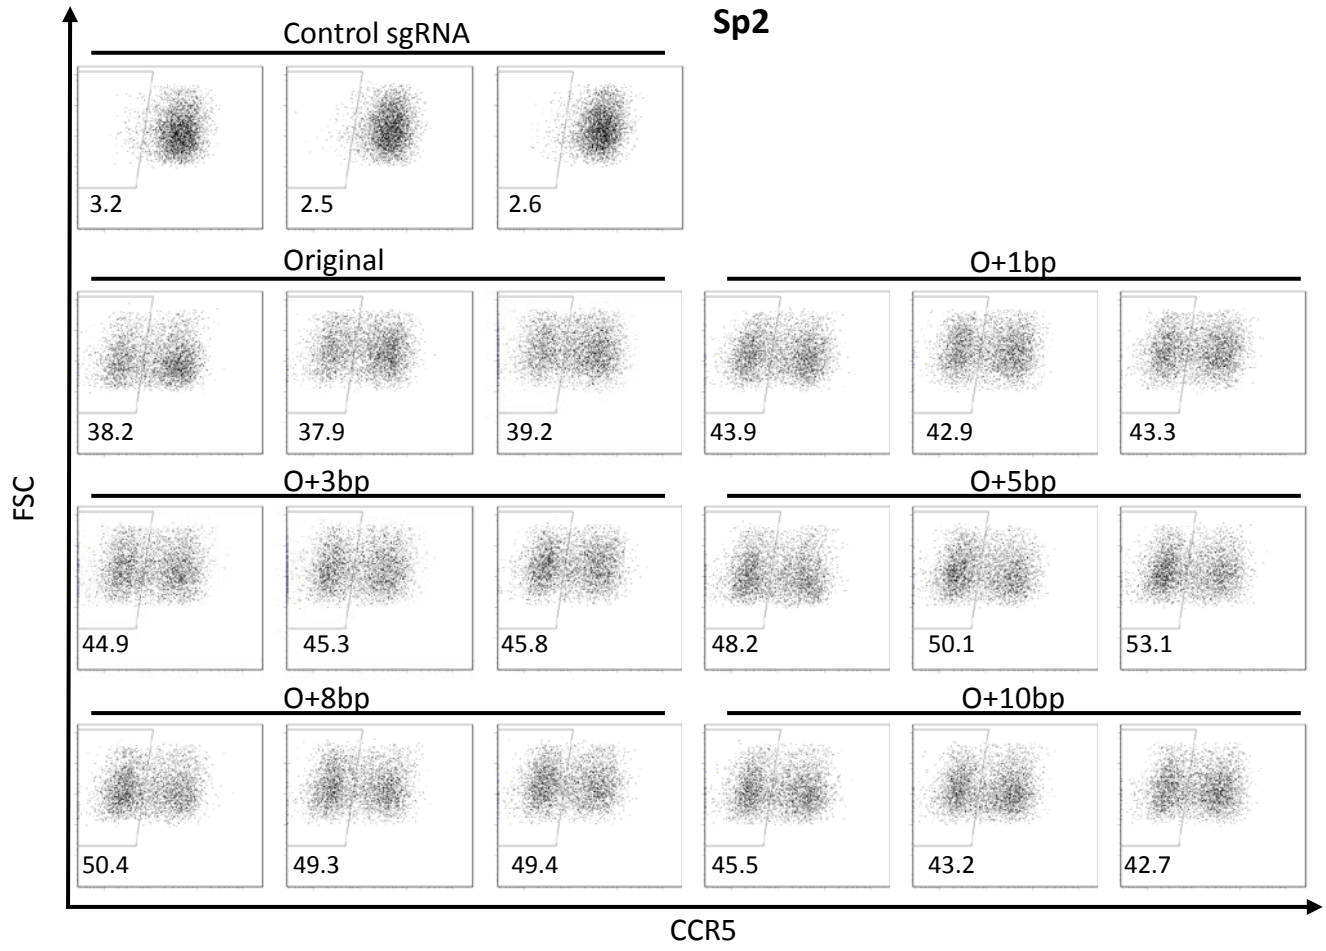

Figure S3

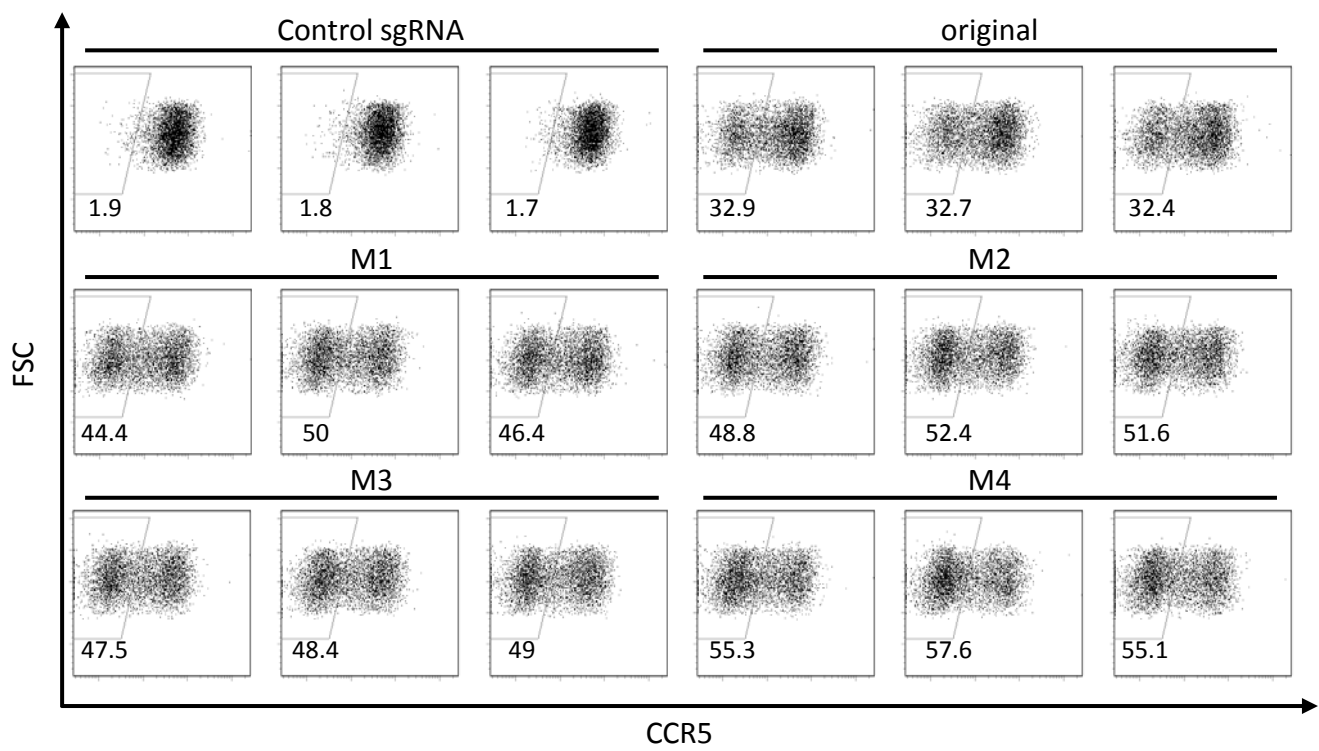



Figure S5

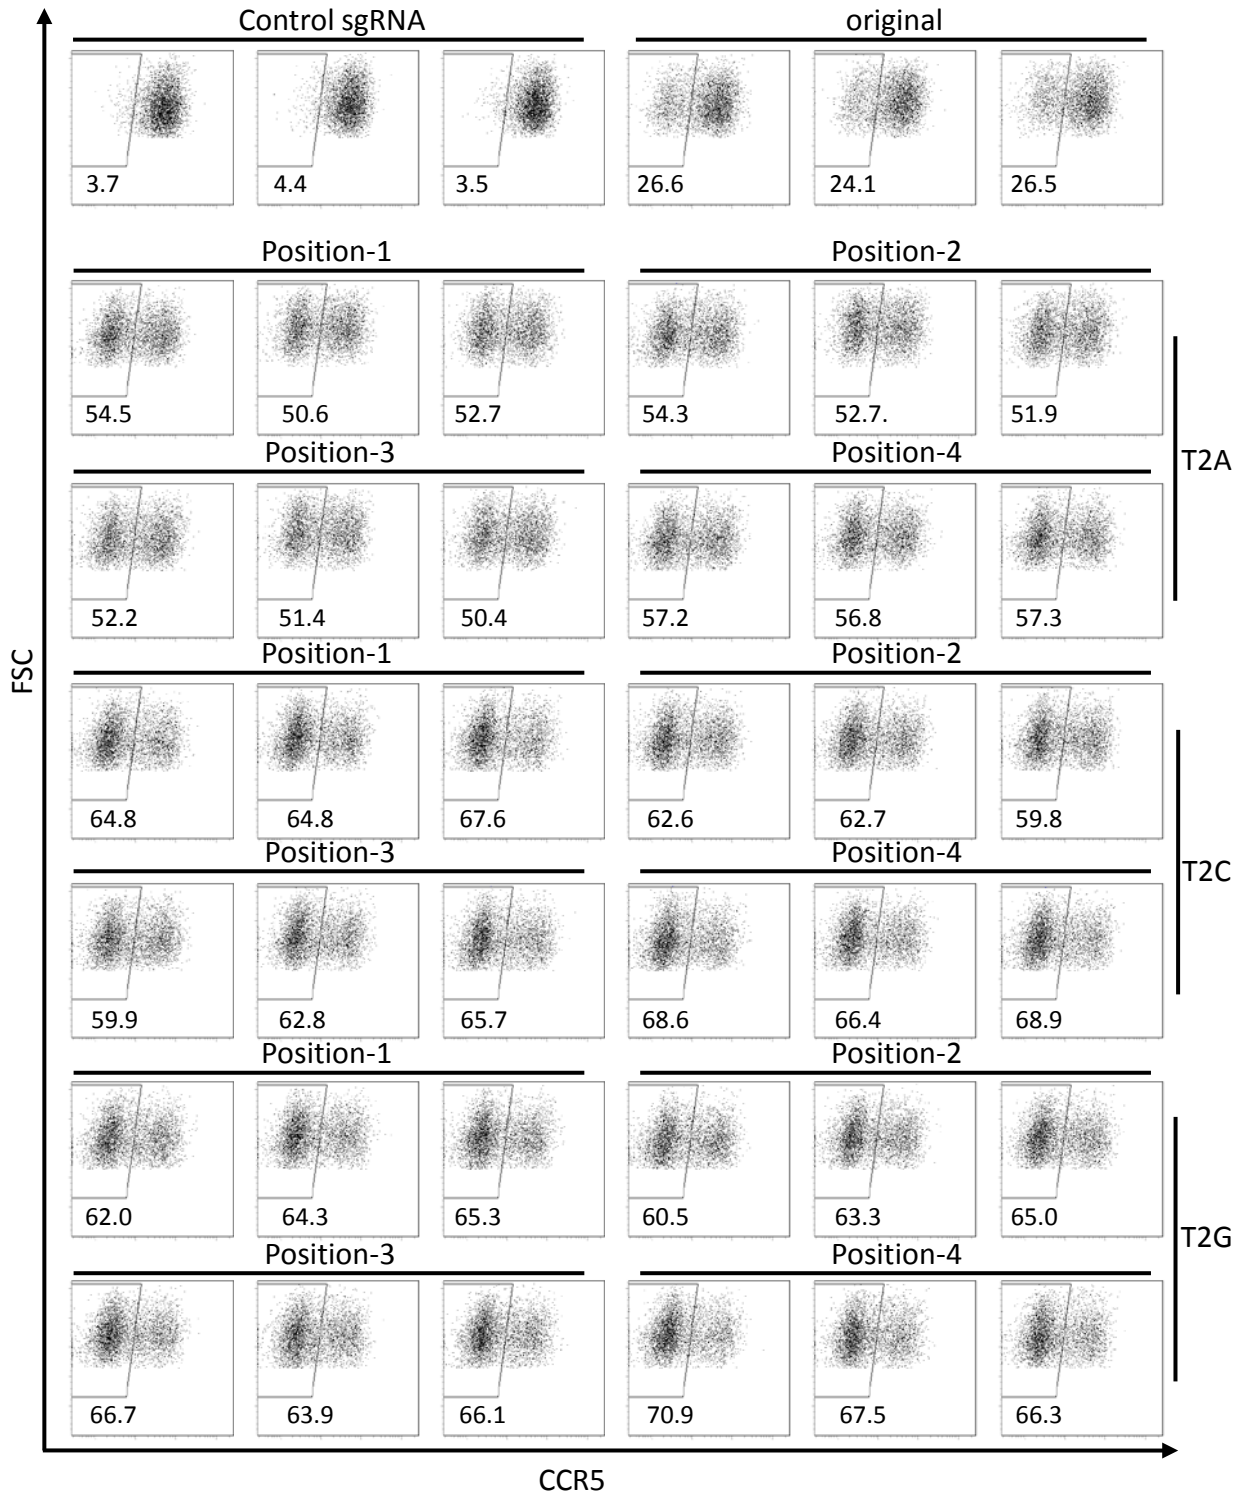

Figure S6

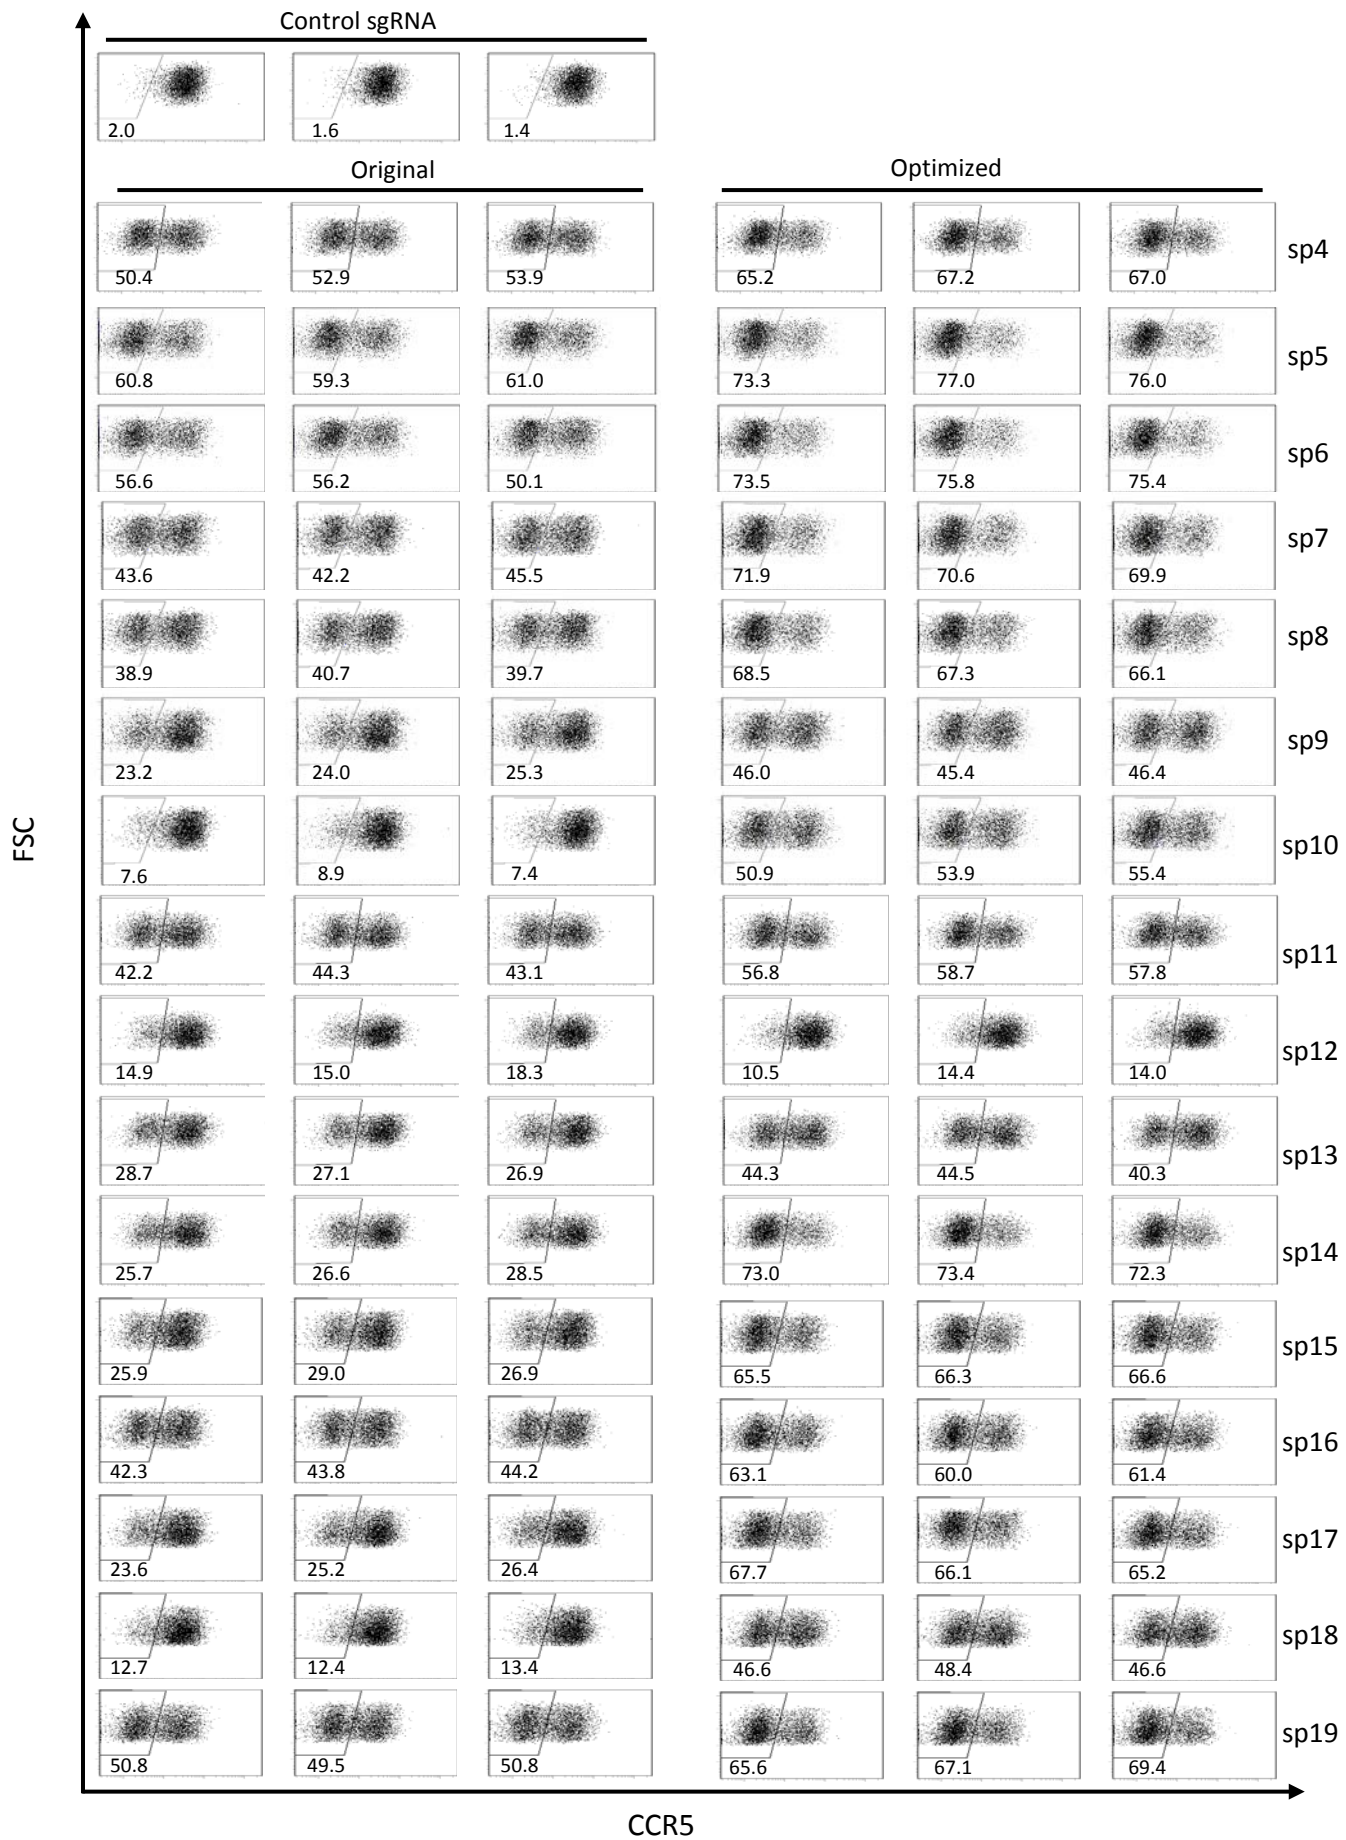

Figure S7

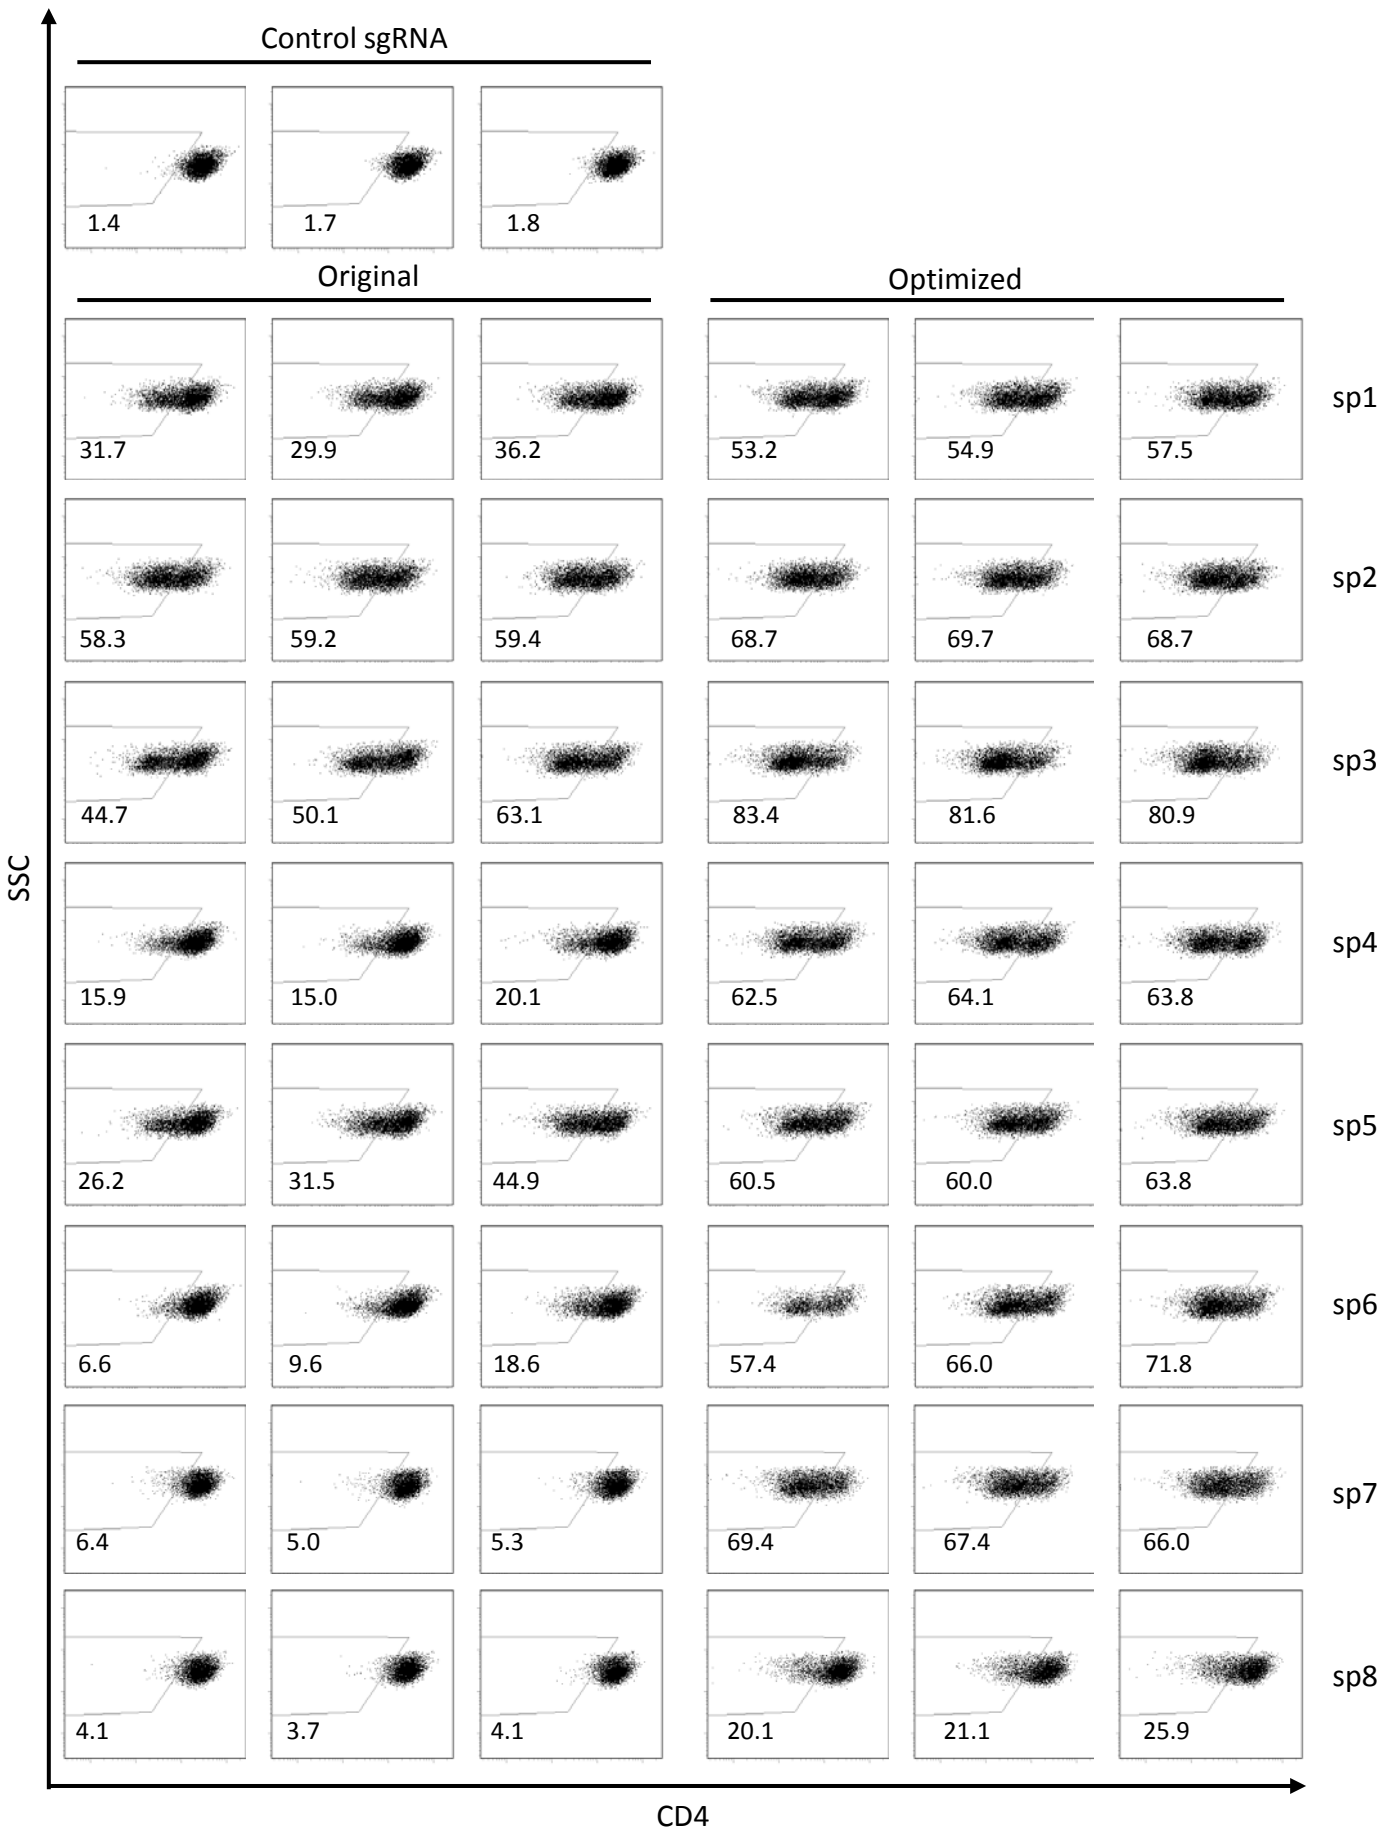

Figure S8

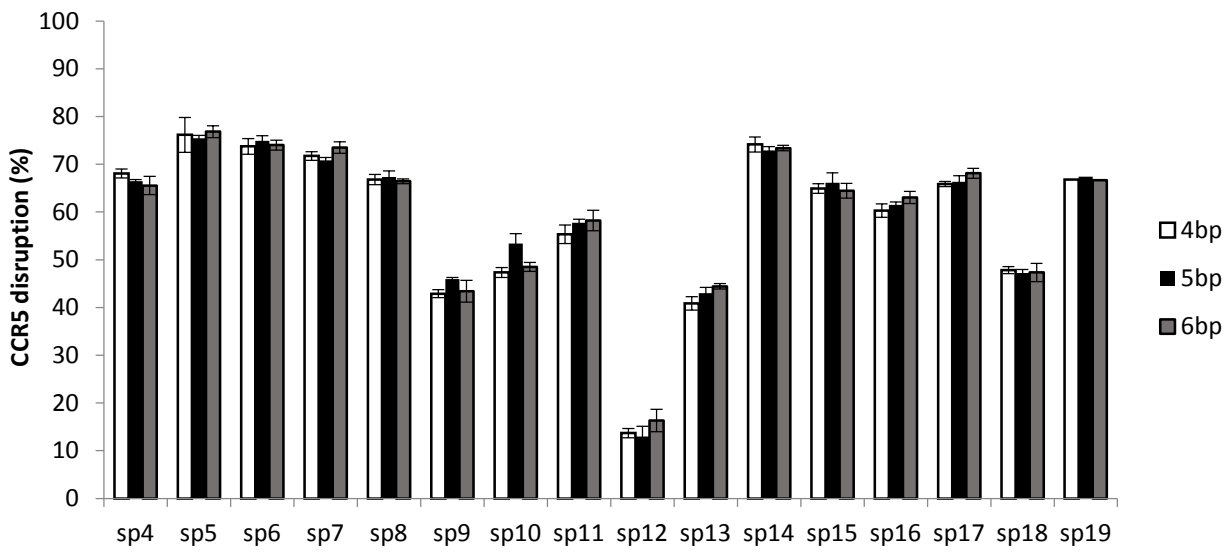



Figure S9

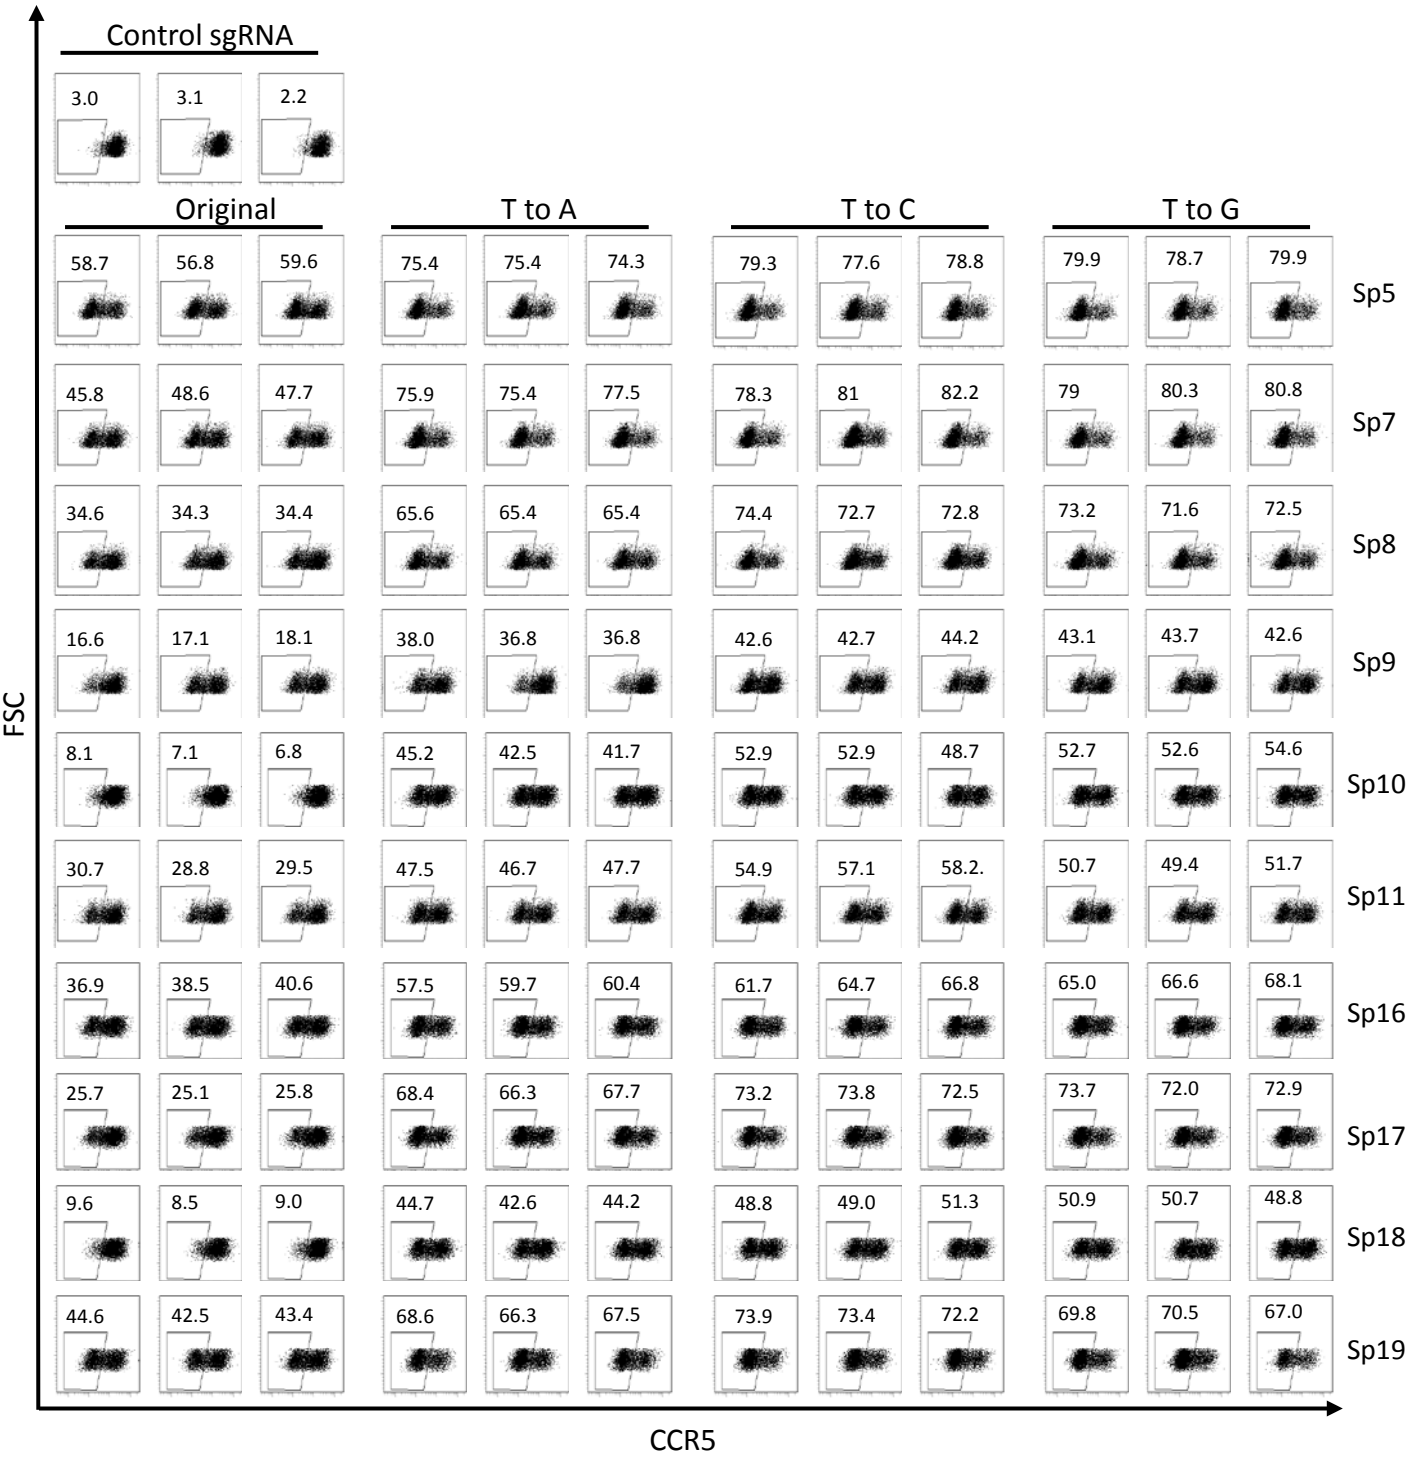

Figure S10

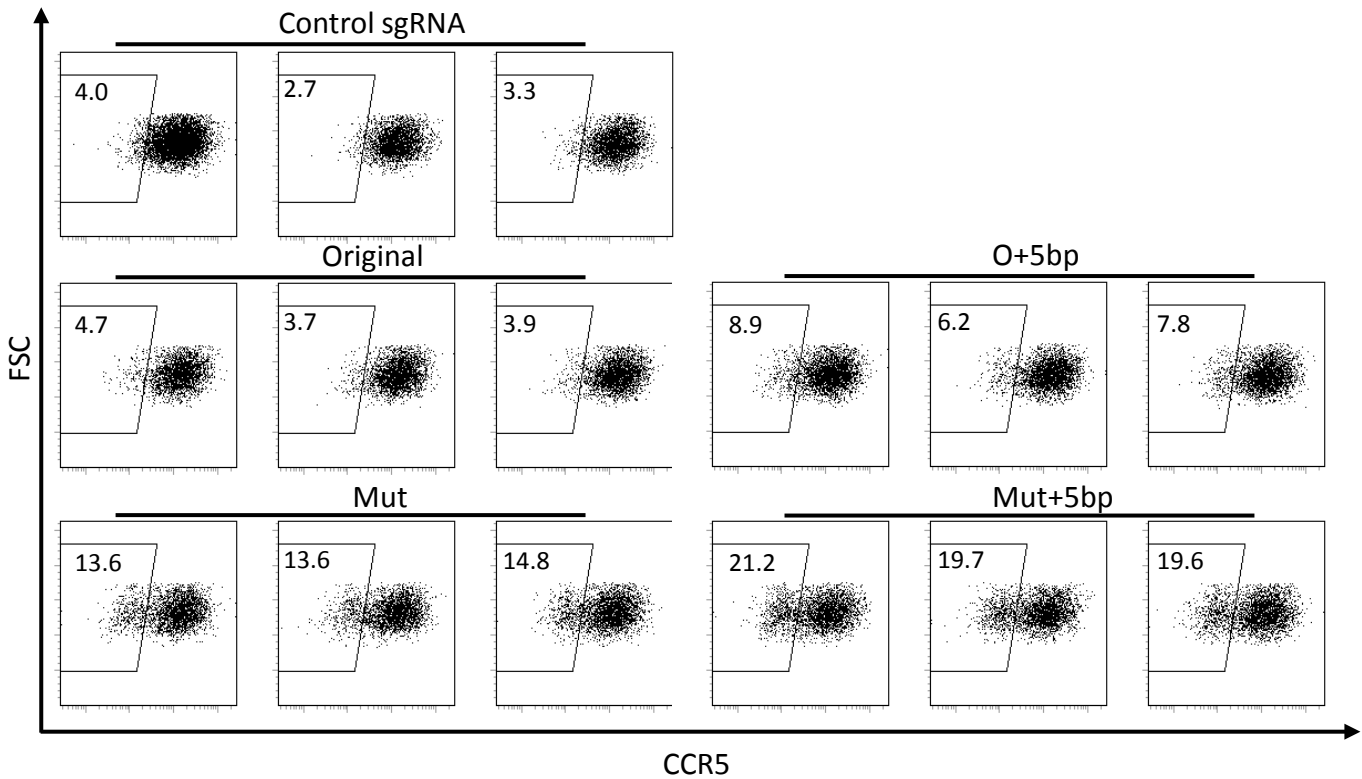

Figure S11

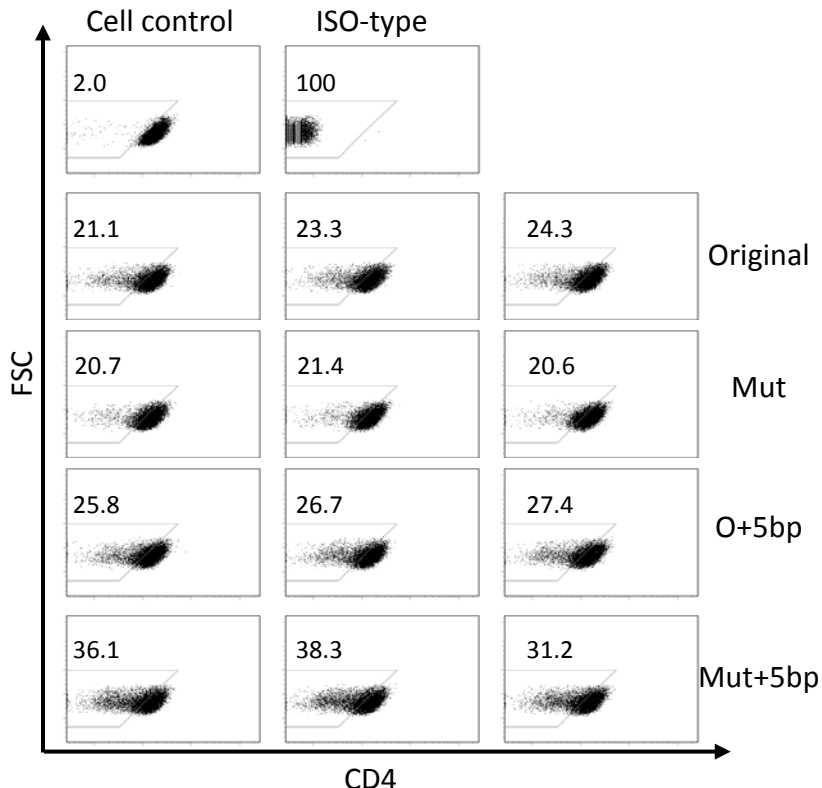

Figure 5d raw data

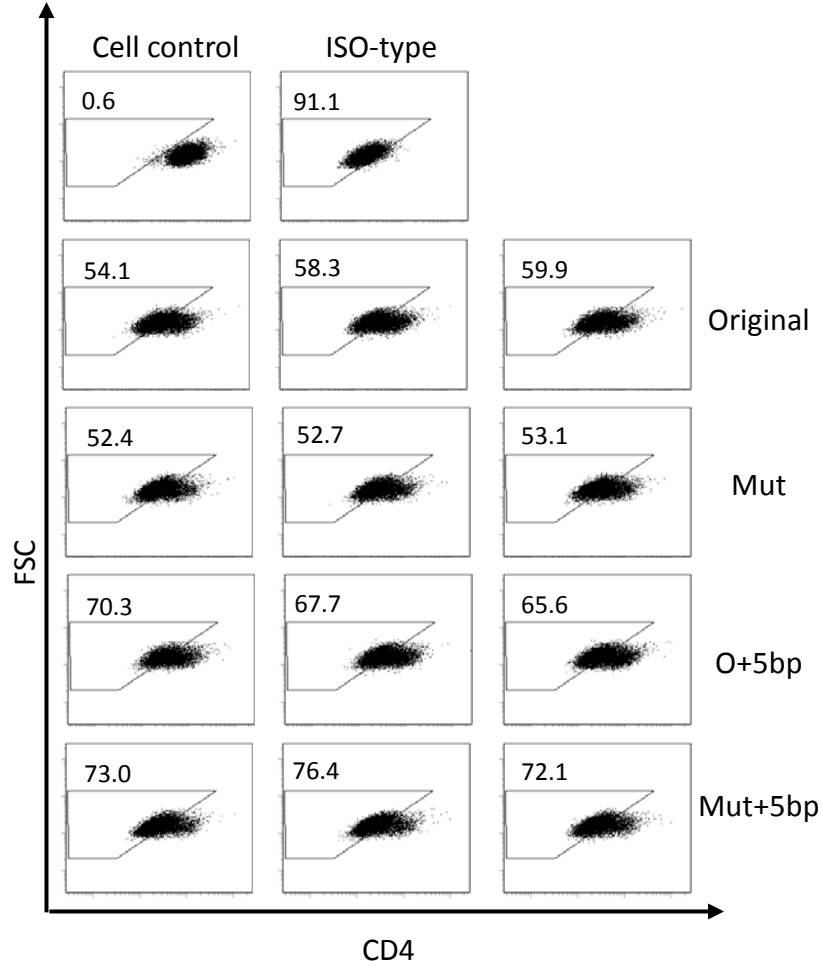

Figure 5e raw data

Figure S12

TZM-bl-Cas9

JLTRG-R5-Cas9

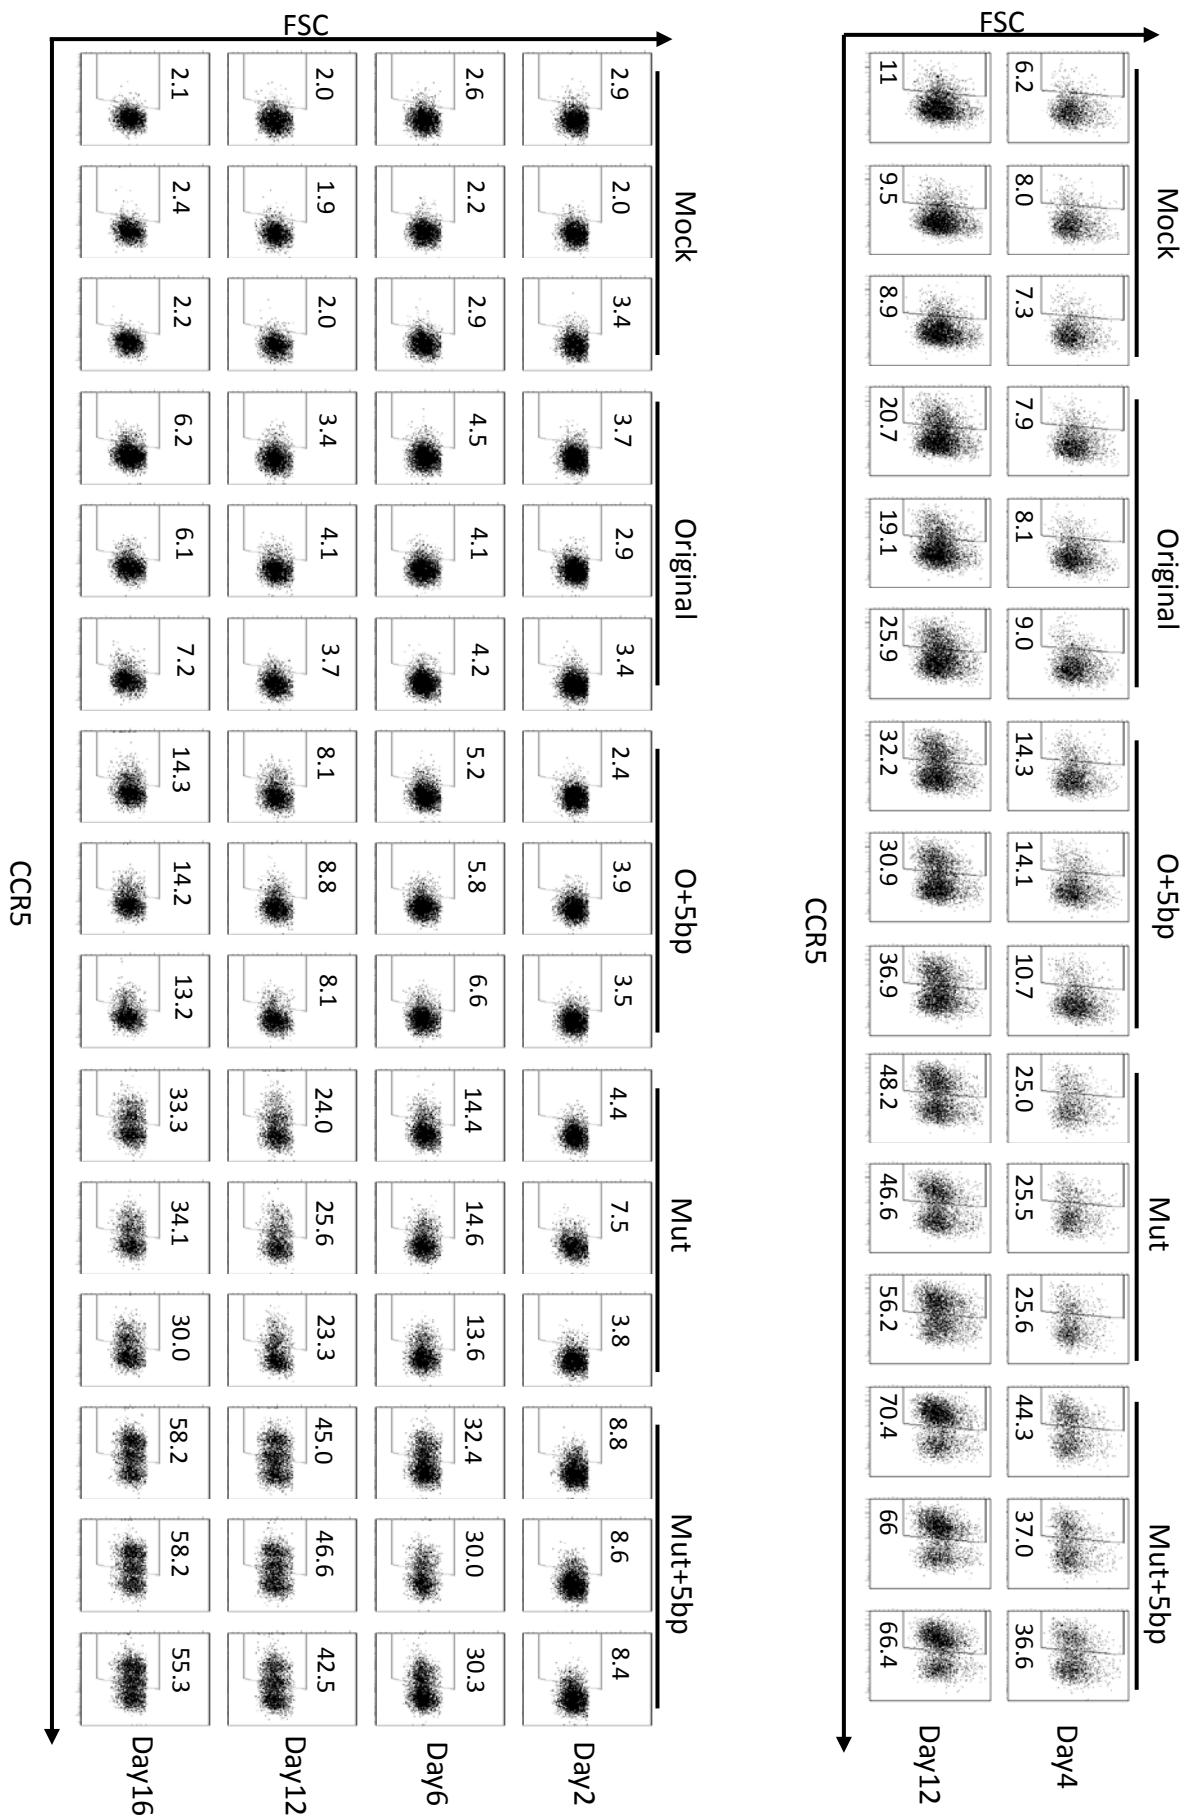

Supplement: 13059_2015_846_MOESM1_ESM.pdf [file 13059_2015_846_MOESM1_ESM.pdf]
